# Supplementary material for: Technical note: GODESS – a profiling mooring in the Gotland Basin
Source: Copernicus journal article supplement (doi:10.5194/os-12-899-2016), 2016-07-06
Supplement: Supplementary file 1 [file os-12-899-2016-supplement.zip]

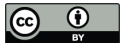

## *Supplement of*

# **Technical note: GODESS – a profiling mooring in the Gotland Basin**

**Ralf D. Prien and Detlef E. Schulz-Bull**

*Correspondence to:* Ralf D. Prien ([ralf.prien@io-warnemuende.de](mailto:ralf.prien@io-warnemuende.de))

- [os-12-899-2016-supplement-title-page.pdf](#)
- [add\\_res.pdf](#)
- [oxy\\_T\\_S\\_sig\\_movie.avi](#)

The copyright of individual parts of the supplement might differ from the CC-BY 3.0 licence.
