# Supplementary material for: Technical note: GODESS – a profiling mooring in the Gotland Basin
Source: Copernicus journal article supplement (doi:10.5194/os-12-899-2016), 2016-07-06
Supplement: Supplementary file 2 [file os-12-899-2016-supplement.zip]

Archive with 3 entries (3 files):
- os-12-899-2016-supplement-title-page.pdf
- add_res.pdf
- oxy_T_S_sig_movie.avi
