# Supplementary material for: Technical note: GODESS – a profiling mooring in the Gotland Basin
Source: Copernicus journal article supplement (doi:10.5194/os-12-899-2016), 2016-07-06
Supplement: Supplementary file 2 [file os-12-899-2016-supplement.zip › add_res.pdf]

### **caption additional resources**

The animation shows data from the profiles of the second GODESS deployment from 3. July 2010 to 5. August 2010. All properties are plotted with the density anomaly as independent variable (y-axis). The panels show, from left to right: dissolved oxygen concentration, temperature and salinity (all in dark blue). The green line in the salinity panel shows the salinity difference to the previous profile multiplied by a factor of 20 and shifted on the salinity scale so that zero difference is plotted at salinity 10. The title line shows the time of start of profile, profile number and deployment duration in hours.
